# Supplementary material for: Bacterial symbiont sharing in Megalomyrmex social parasites and their fungus‐growing ant hosts
Source: PubMed Central journal article supplement — Mol Ecol. 2015 Jun 9;24(12):3151–69. doi: 10.1111/mec.13216 (PMC5008137; doi:10.1111/mec.13216), 2015-06-09
Supplement: MEC-24-3151-s001.pdf [file MEC-24-3151-s001.pdf]

**Fig. S1**

(A)

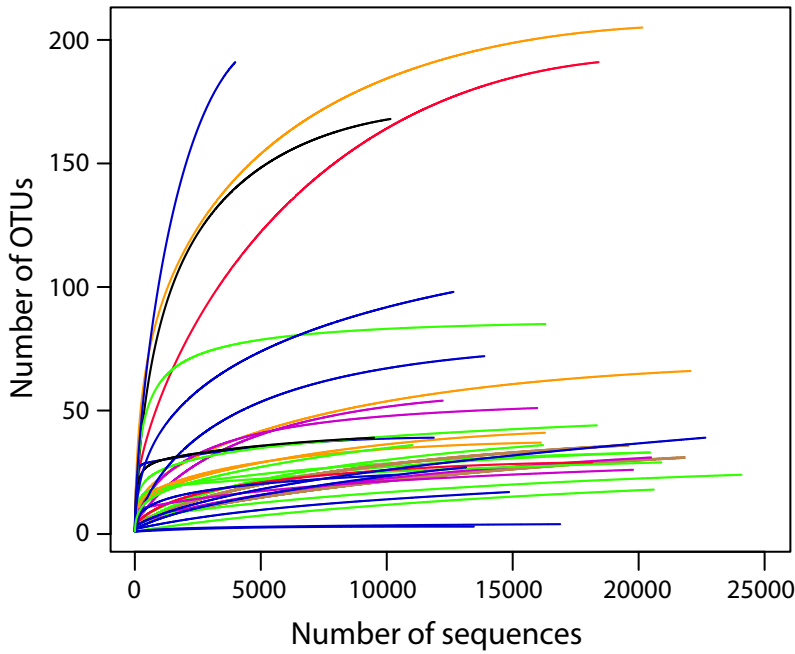

| Sample (Species / Nest ID)                      | N sequences | N OTUs |
|-------------------------------------------------|-------------|--------|
| <i>Megalomyrmex wettereri</i> RMMA100604-08     | 20147       | 205    |
| <i>Sericomyrmex amabilis</i> JOA120528-05       | 3987        | 191    |
| <i>Cyphomyrmex cornutus</i> RMMA030213-09       | 18409       | 191    |
| Fungus garden JOA120528-02                      | 10149       | 168    |
| <i>Sericomyrmex amabilis</i> RMMA120514-01      | 12648       | 98     |
| <i>Megalomyrmex wallacei</i> RMMA110328-05      | 16300       | 85     |
| <i>Sericomyrmex amabilis</i> AI110511-05        | 13874       | 72     |
| <i>Cyphomyrmex longiscapus</i> JL110513-03      | 22056       | 66     |
| <i>Cyphomyrmex costatus</i> RMMA110521-04       | 12221       | 54     |
| <i>Megalomyrmex mondaboroides</i> RMMA110521-04 | 15975       | 51     |
| <i>Megalomyrmex staudingeri</i> RMMA040609-05   | 18338       | 44     |
| <i>Cyphomyrmex longiscapus</i> RMMA110523-06    | 16284       | 41     |
| Fungus garden JOA120604-03                      | 9051        | 39     |
| <i>Megalomyrmex symmetochus</i> RMMA120514-01   | 11867       | 39     |
| <i>Sericomyrmex amabilis</i> JOA120525-01       | 22649       | 39     |
| <i>Megalomyrmex wettereri</i> RMMA100629-06     | 16121       | 37     |
| <i>Megalomyrmex longinoi</i> RMMA100625-01      | 11022       | 36     |
| <i>Megalomyrmex modestus</i> RMMA110328-09      | 16201       | 36     |
| <i>Trachymyrmex zeteki</i> RMMA050727-06        | 19611       | 36     |
| <i>Megalomyrmex incisus</i> RMMA060311-15       | 20426       | 33     |
| <i>Megalomyrmex glaesarius</i> RMMA060314-03    | 20454       | 33     |
| <i>Cyphomyrmex costatus</i> RMMA100624-18       | 20496       | 31     |
| <i>Megalomyrmex adamsae</i> RMMA050727-06       | 21862       | 31     |
| <i>Megalomyrmex mondabora</i> RMMA030213-09     | 18159       | 29     |
| <i>Megalomyrmex incisus</i> BeB000836-2         | 20899       | 29     |
| <i>Sericomyrmex amabilis</i> JOA120604-03       | 13148       | 27     |
| <i>Megalomyrmex silvestrii</i> GBM.sil2010      | 19777       | 26     |
| <i>Sericomyrmex amabilis</i> JOA120528-02       | 10404       | 24     |
| <i>Megalomyrmex foreli</i> RMMA110323-05        | 24079       | 24     |
| <i>Megalomyrmex milena</i> BA130514-18          | 20604       | 18     |
| <i>Megalomyrmex symmetochus</i> AI110511-05     | 14857       | 17     |
| <i>Megalomyrmex symmetochus</i> JOA120604-03    | 16885       | 4      |
| <i>Megalomyrmex symmetochus</i> JOA120528-05    | 13456       | 3      |

(B)

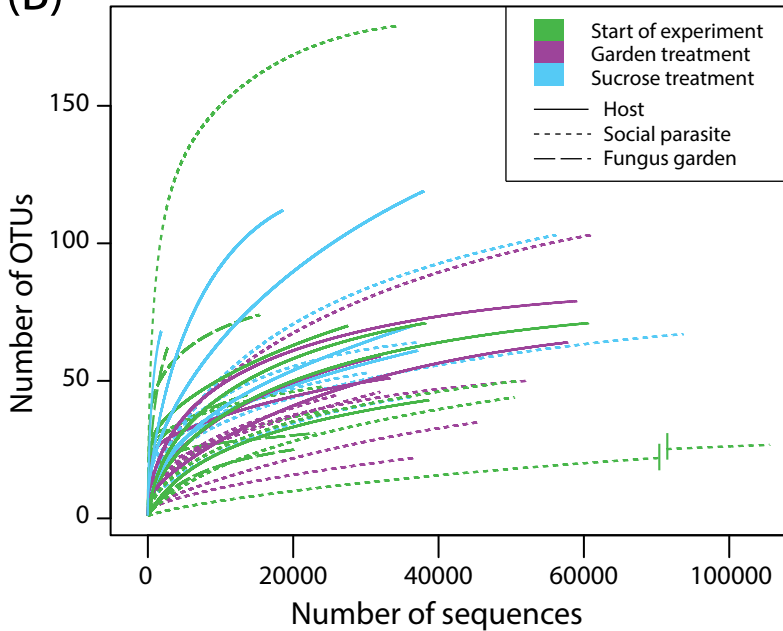

| Sample (Species / Nest ID)                      | N sequences | N OTUs |
|-------------------------------------------------|-------------|--------|
| <i>Megalomyrmex mondaboroides</i> RMMA110521-04 | 34472       | 179    |
| <i>Sericomyrmex amabilis</i> AI110515-06        | 37959       | 119    |
| <i>Sericomyrmex amabilis</i> RMMA120514-01      | 18569       | 112    |
| <i>Megalomyrmex symmetochus</i> RMMA120514-01   | 56147       | 103    |
| <i>Megalomyrmex symmetochus</i> JOA120604-01    | 60881       | 103    |
| <i>Sericomyrmex amabilis</i> JOA120604-01       | 59063       | 79     |
| Fungus garden RMMA100629-06                     | 15385       | 74     |
| <i>Sericomyrmex amabilis</i> JOA120604-01       | 60613       | 71     |
| <i>Sericomyrmex amabilis</i> RMMA120514-01      | 38231       | 71     |
| <i>Sericomyrmex amabilis</i> JOA120604-01       | 36386       | 70     |
| <i>Sericomyrmex amabilis</i> AI110515-06        | 27541       | 70     |
| <i>Sericomyrmex amabilis</i> JOA120516-01       | 1839        | 68     |
| <i>Megalomyrmex symmetochus</i> JOA120604-01    | 73705       | 67     |
| <i>Megalomyrmex symmetochus</i> JOA120516-01    | 37294       | 64     |
| <i>Sericomyrmex amabilis</i> RMMA120514-01      | 57783       | 64     |
| Fungus garden JOA120604-01                      | 2719        | 62     |
| <i>Megalomyrmex mondaboroides</i> RMMA110521-04 | 37129       | 61     |
| <i>Sericomyrmex amabilis</i> JOA120516-01       | 31949       | 59     |
| <i>Megalomyrmex wettereri</i> RMMA100629-06     | 30336       | 53     |
| <i>Sericomyrmex amabilis</i> AI110515-06        | 33339       | 51     |
| <i>Megalomyrmex symmetochus</i> JOA120516-01    | 52055       | 50     |
| <i>Megalomyrmex symmetochus</i> RMMA120514-01   | 51140       | 50     |
| <i>Megalomyrmex symmetochus</i> JOA120604-01    | 24309       | 48     |
| <i>Megalomyrmex mondaboroides</i> RMMA110521-04 | 31961       | 46     |
| Fungus garden RMMA110521-04                     | 13706       | 45     |
| <i>Megalomyrmex wettereri</i> RMMA100629-06     | 26172       | 45     |
| <i>Megalomyrmex symmetochus</i> AI110515-06     | 36024       | 44     |
| <i>Megalomyrmex wettereri</i> RMMA100629-06     | 50452       | 44     |
| <i>Sericomyrmex amabilis</i> JOA120516-01       | 38662       | 43     |
| <i>Megalomyrmex symmetochus</i> AI110515-06     | 27658       | 40     |
| <i>Megalomyrmex symmetochus</i> RMMA120514-01   | 45600       | 35     |
| Fungus garden RMMA120514-01                     | 3556        | 33     |
| Fungus garden JOA120516-01                      | 23071       | 31     |
| <i>Megalomyrmex symmetochus</i> JOA120516-01    | 128170      | 29     |
| Fungus garden AI110515-06                       | 20085       | 25     |
| <i>Megalomyrmex symmetochus</i> AI110515-06     | 36675       | 22     |

**Fig. S1** Rarefaction curves of tag-encoded FLX 454 pyrosequencing samples (A) and Illumina MiSeq diet experiment samples (B). Plots show the number of OTUs as a function of the simulated sequencing effort, with sample IDs and number of assigned reads and OTUs per sample given towards the right of the plots. Samples from (A) are colored based on the different specific host-parasite associations and free-living *Megalomyrmex* as in Fig. 1 with the two fungus gardens in black, while samples from (B) are colored by experimental treatment group.

Fig. S2

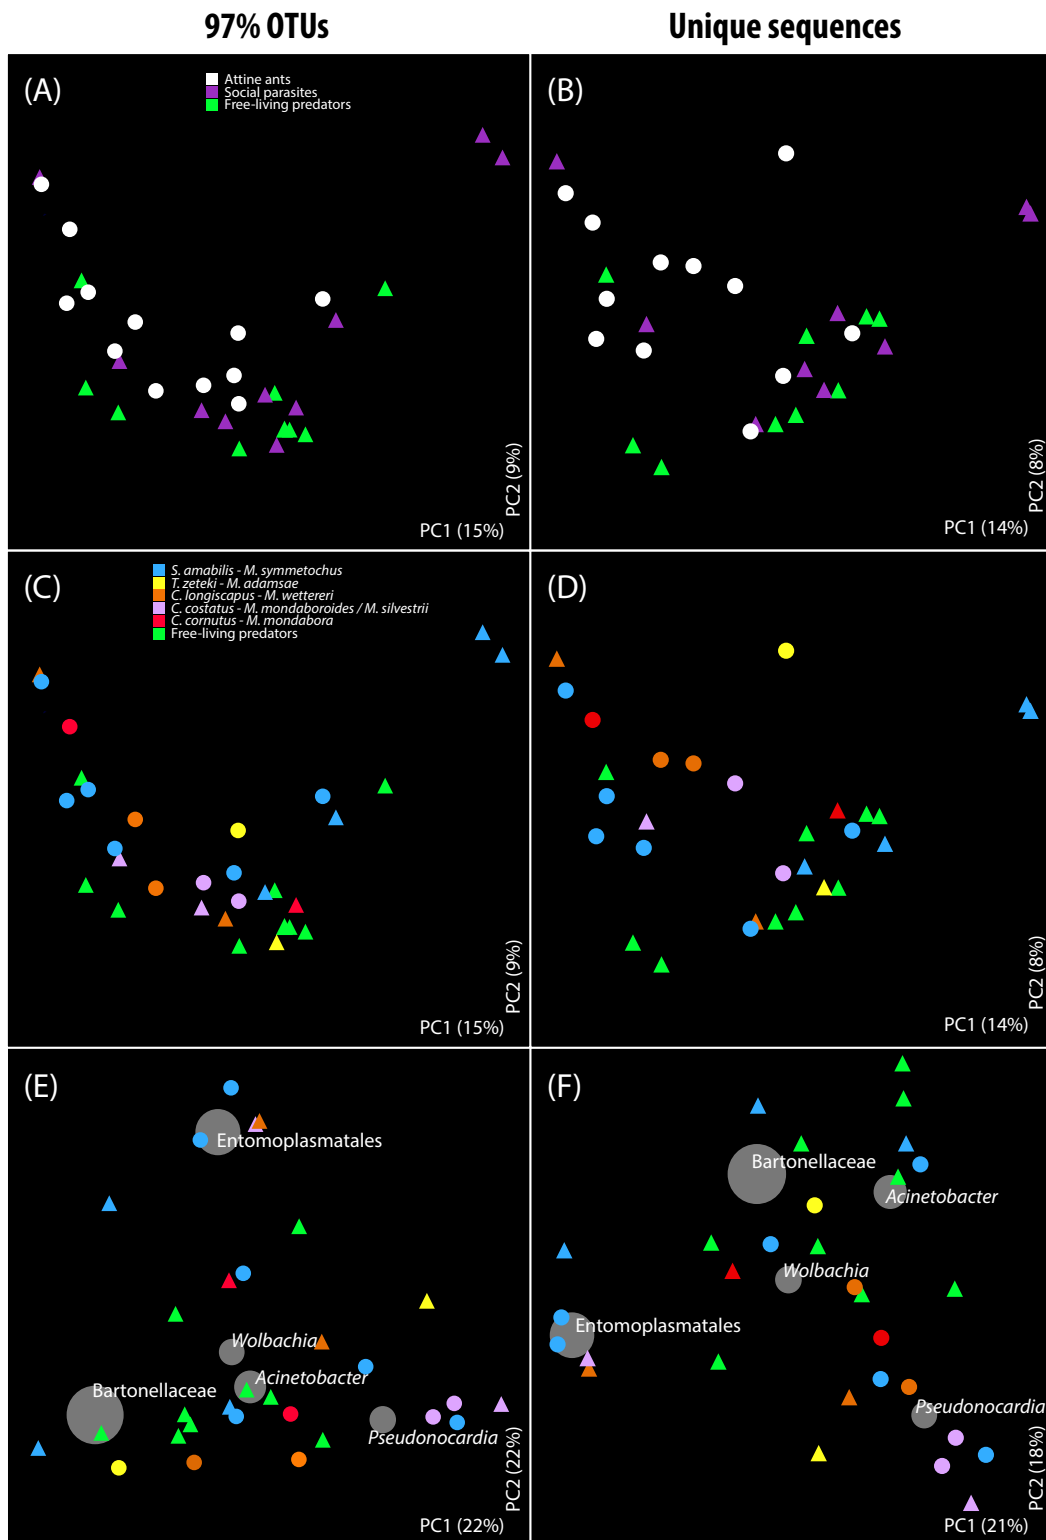

**Fig. S2** Principal Coordinates Analyses (PCoA) of unweighted UniFrac metrics based on 97% OTUs (A and C) or unique sequences (B and D) and PCoA bi-plots of weighted UniFrac metrics based on 97% OTUs (E) or unique sequences (F). *Megalomyrmex* samples are shown as triangles and attine host samples as circles. The A, B, C and D plots are identical to the plots given in Fig. 2, but have colored symbols to illustrate how samples are assigned to the different categories. Panels A and B are colored by hosts (white), social parasites (purple) and free-living predators (green), while, as in Fig. 1, symbols in panels C, D, E and F are colored by the five categories of associated hosts and social parasites, with the free-living *Megalomyrmex* predators being plotted in green as a sixth category. The positions of the triangles and circles are averages after 100 jackknife replications. The bi-plots (panels E and F) show the contribution of each of the five most abundant bacterial lineages (grey circles with diameters proportional to the mean relative abundance of the taxon across all samples) to the clustering patterns of ant samples.

**Fig. S3**

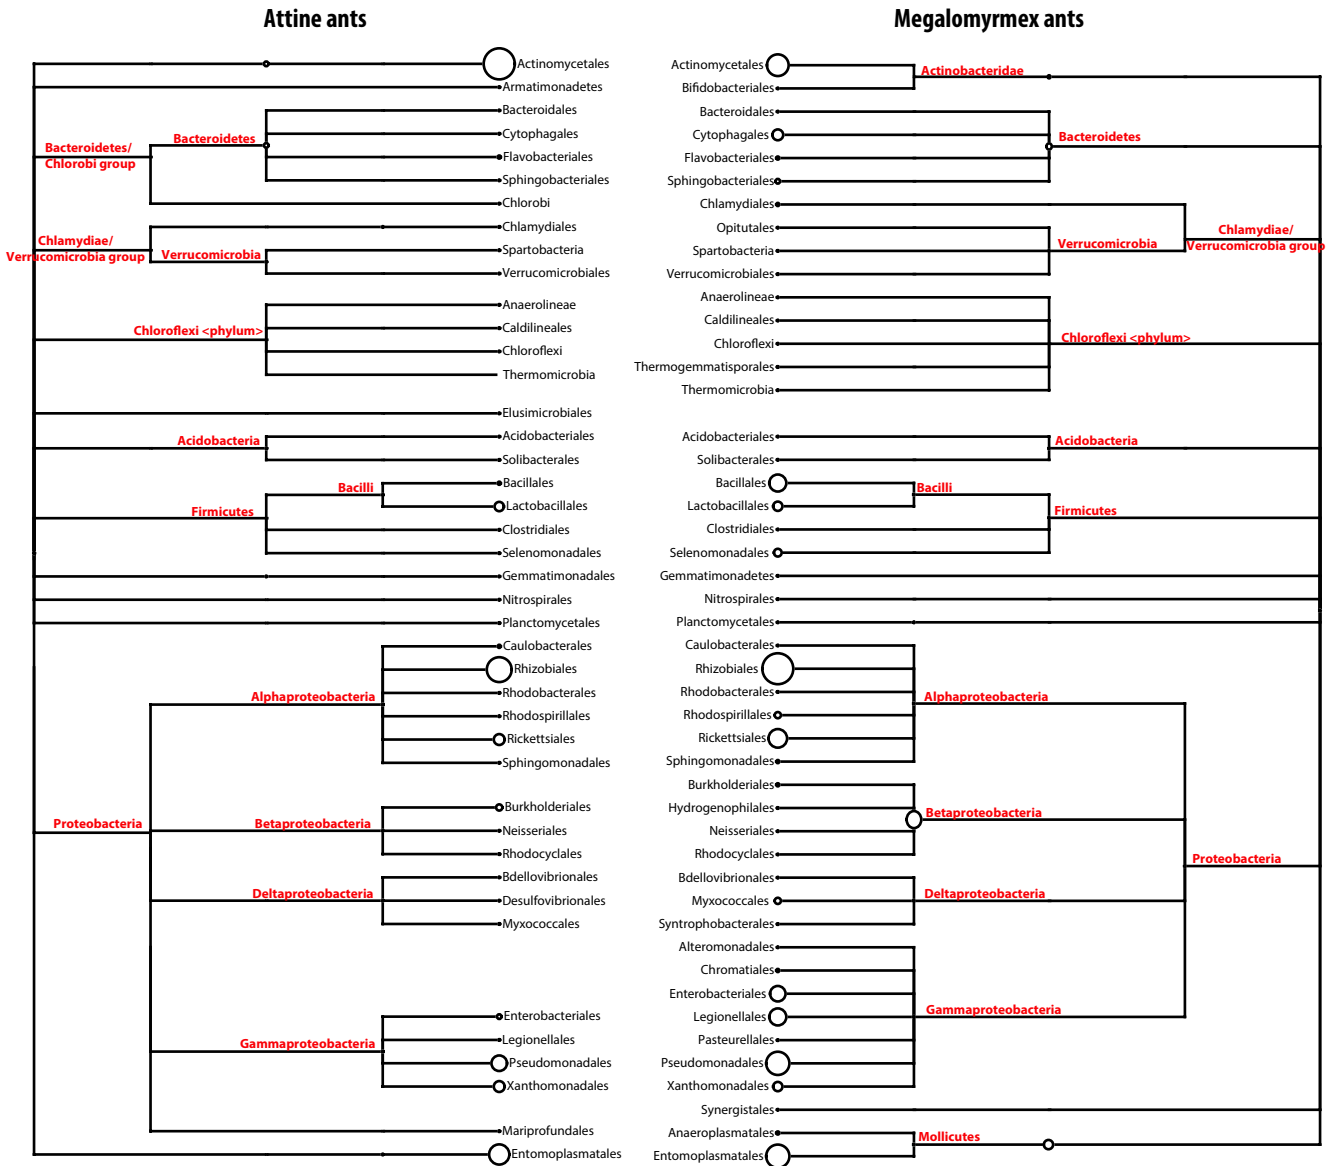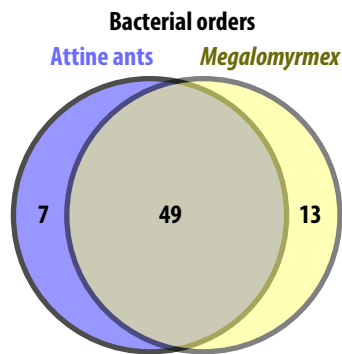

**Fig. S3** Phylogenetic trees of all 69 bacterial orders identified across attine and *Megalomyrmex* ants from the 454 16S rRNA pyrosequencing dataset. White circles at the tips of branches are proportional to the square-root of all the reads found in each order. The Venn diagram shows the proportion of unique and shared bacterial orders between the two ant lineages. Each bacterial order was identified from at least one sample of *Megalomyrmex* and/or attine ants.

**Fig. S4**

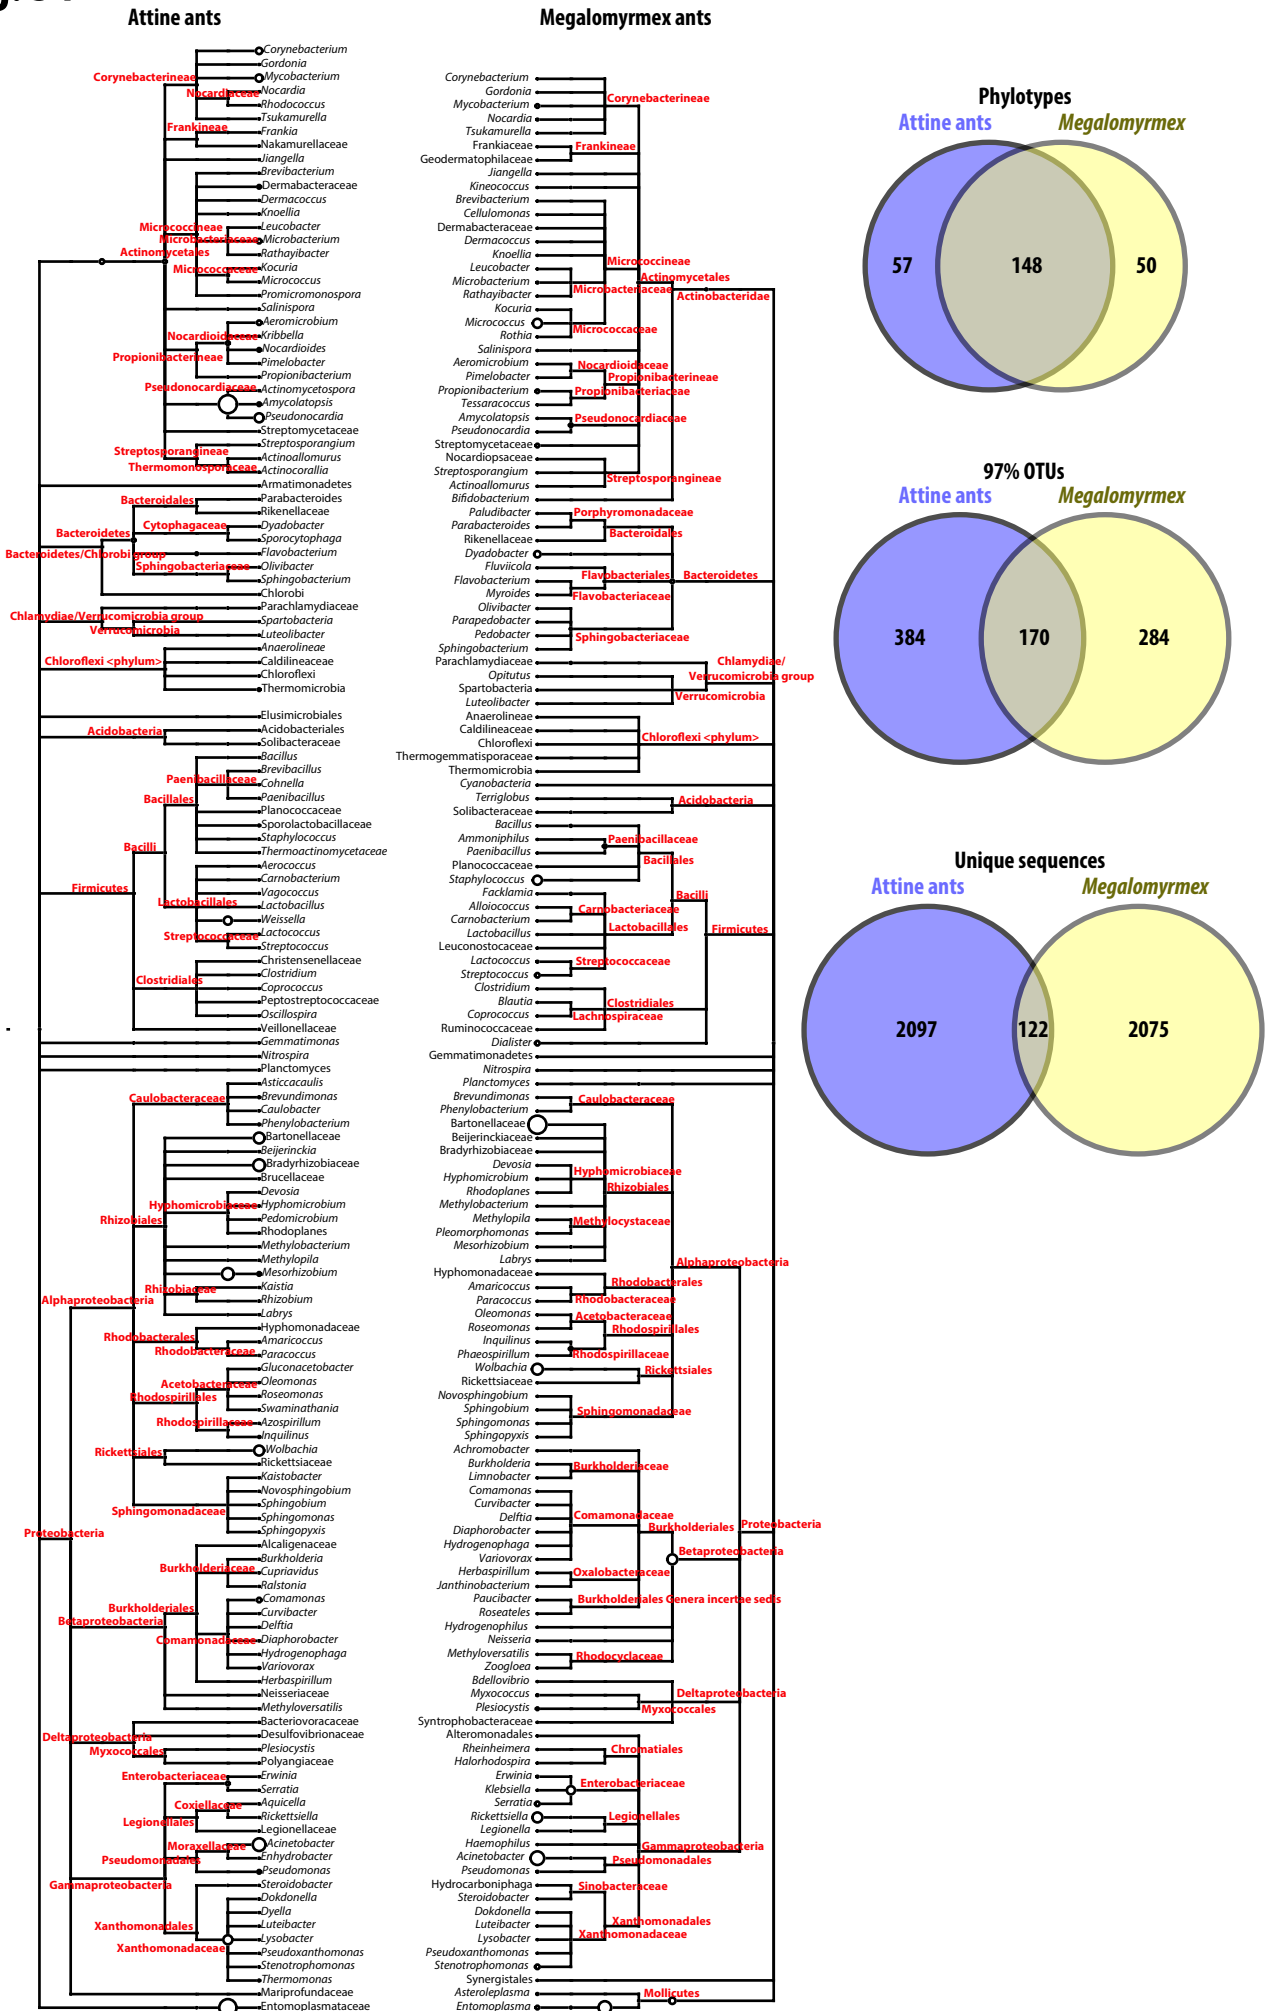

**Fig. S4** Phylogenetic trees of all 255 bacterial phylotypes identified across attine and *Megalomyrmex* ants from the 454 16S rRNA pyrosequencing dataset. White circles at the tips of branches are proportional to the square-root of all the reads found in each phylotype. Venn diagrams show the proportion of unique and shared bacterial phylotypes, 97% OTUs and unique sequences between the two ant lineages. Each phylotype, OTU or unique sequence was identified from at least one sample of *Megalomyrmex* and/or attine ants.



Fig. S5

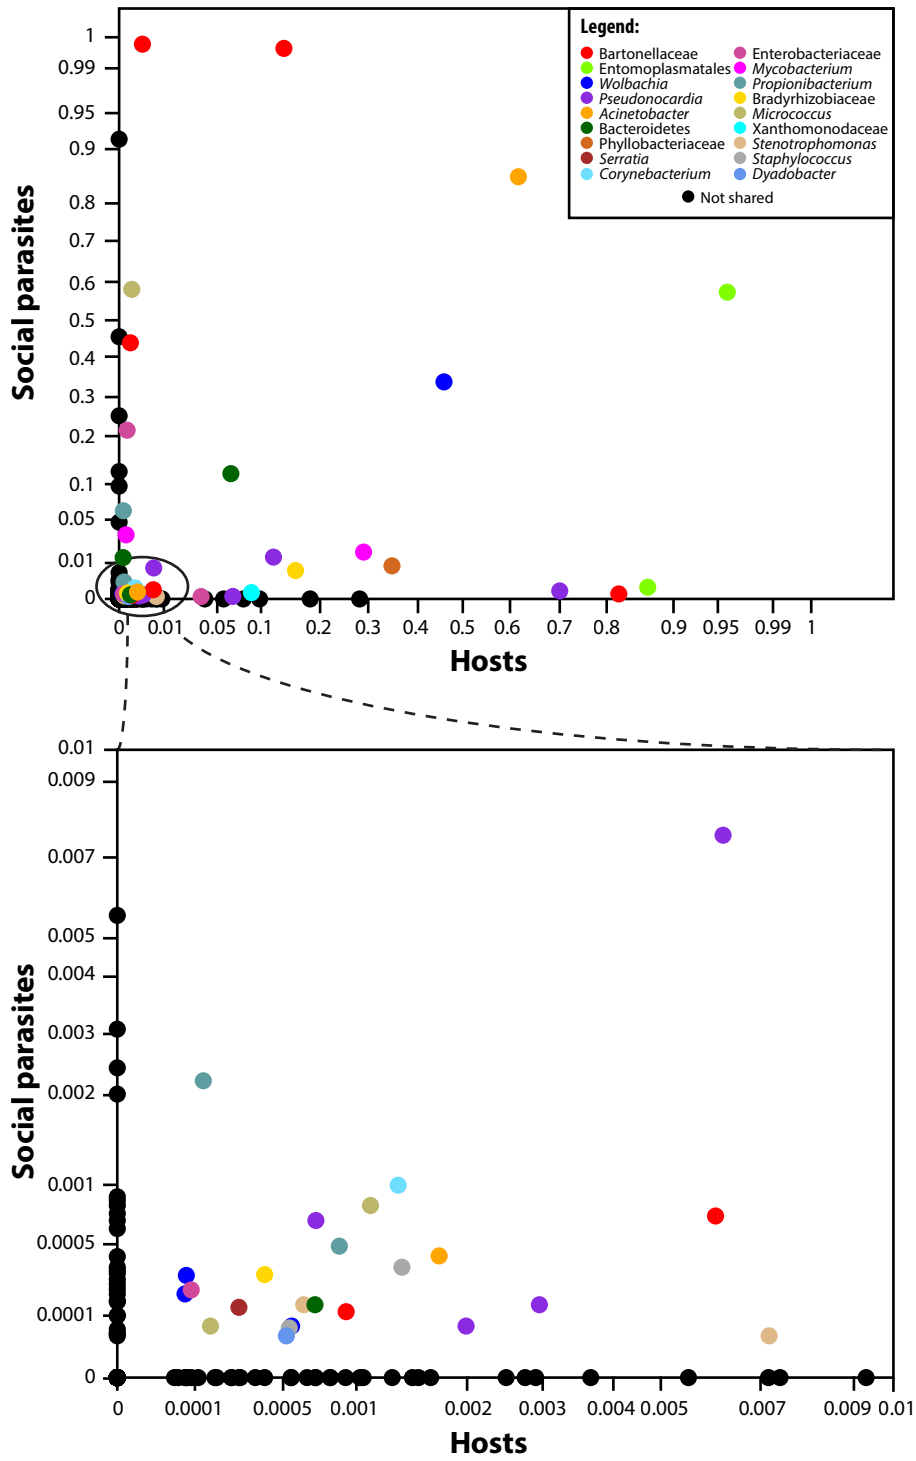

**Fig. S5** Proportions of shared phlotypes in hosts and social parasites from joint nests as estimated from the 454 16S rRNA pyrosequencing dataset. Each dot combines the relative abundance in social parasites (y axes) and hosts (x axes) of a single phylotype in one of the eight nests from which hosts and parasites were collected jointly (H and P symbols next to pie charts in Fig. 3). Shared phlotypes are color-coded (cf. inset) and non-shared phlotypes are plotted in black. Note that the same phylotype can be shared in one nest but not in another and that there can be multiple dots with the same color, representing the same phylotype shared between hosts and parasites from different nests. Relative abundances are plotted on arcsine transformed scales to enhance separation between shared and non-shared phlotypes. Phlotypes that were infecting the ants only in trace amounts are shown in further detail in the lower plot.

**Fig. S6**

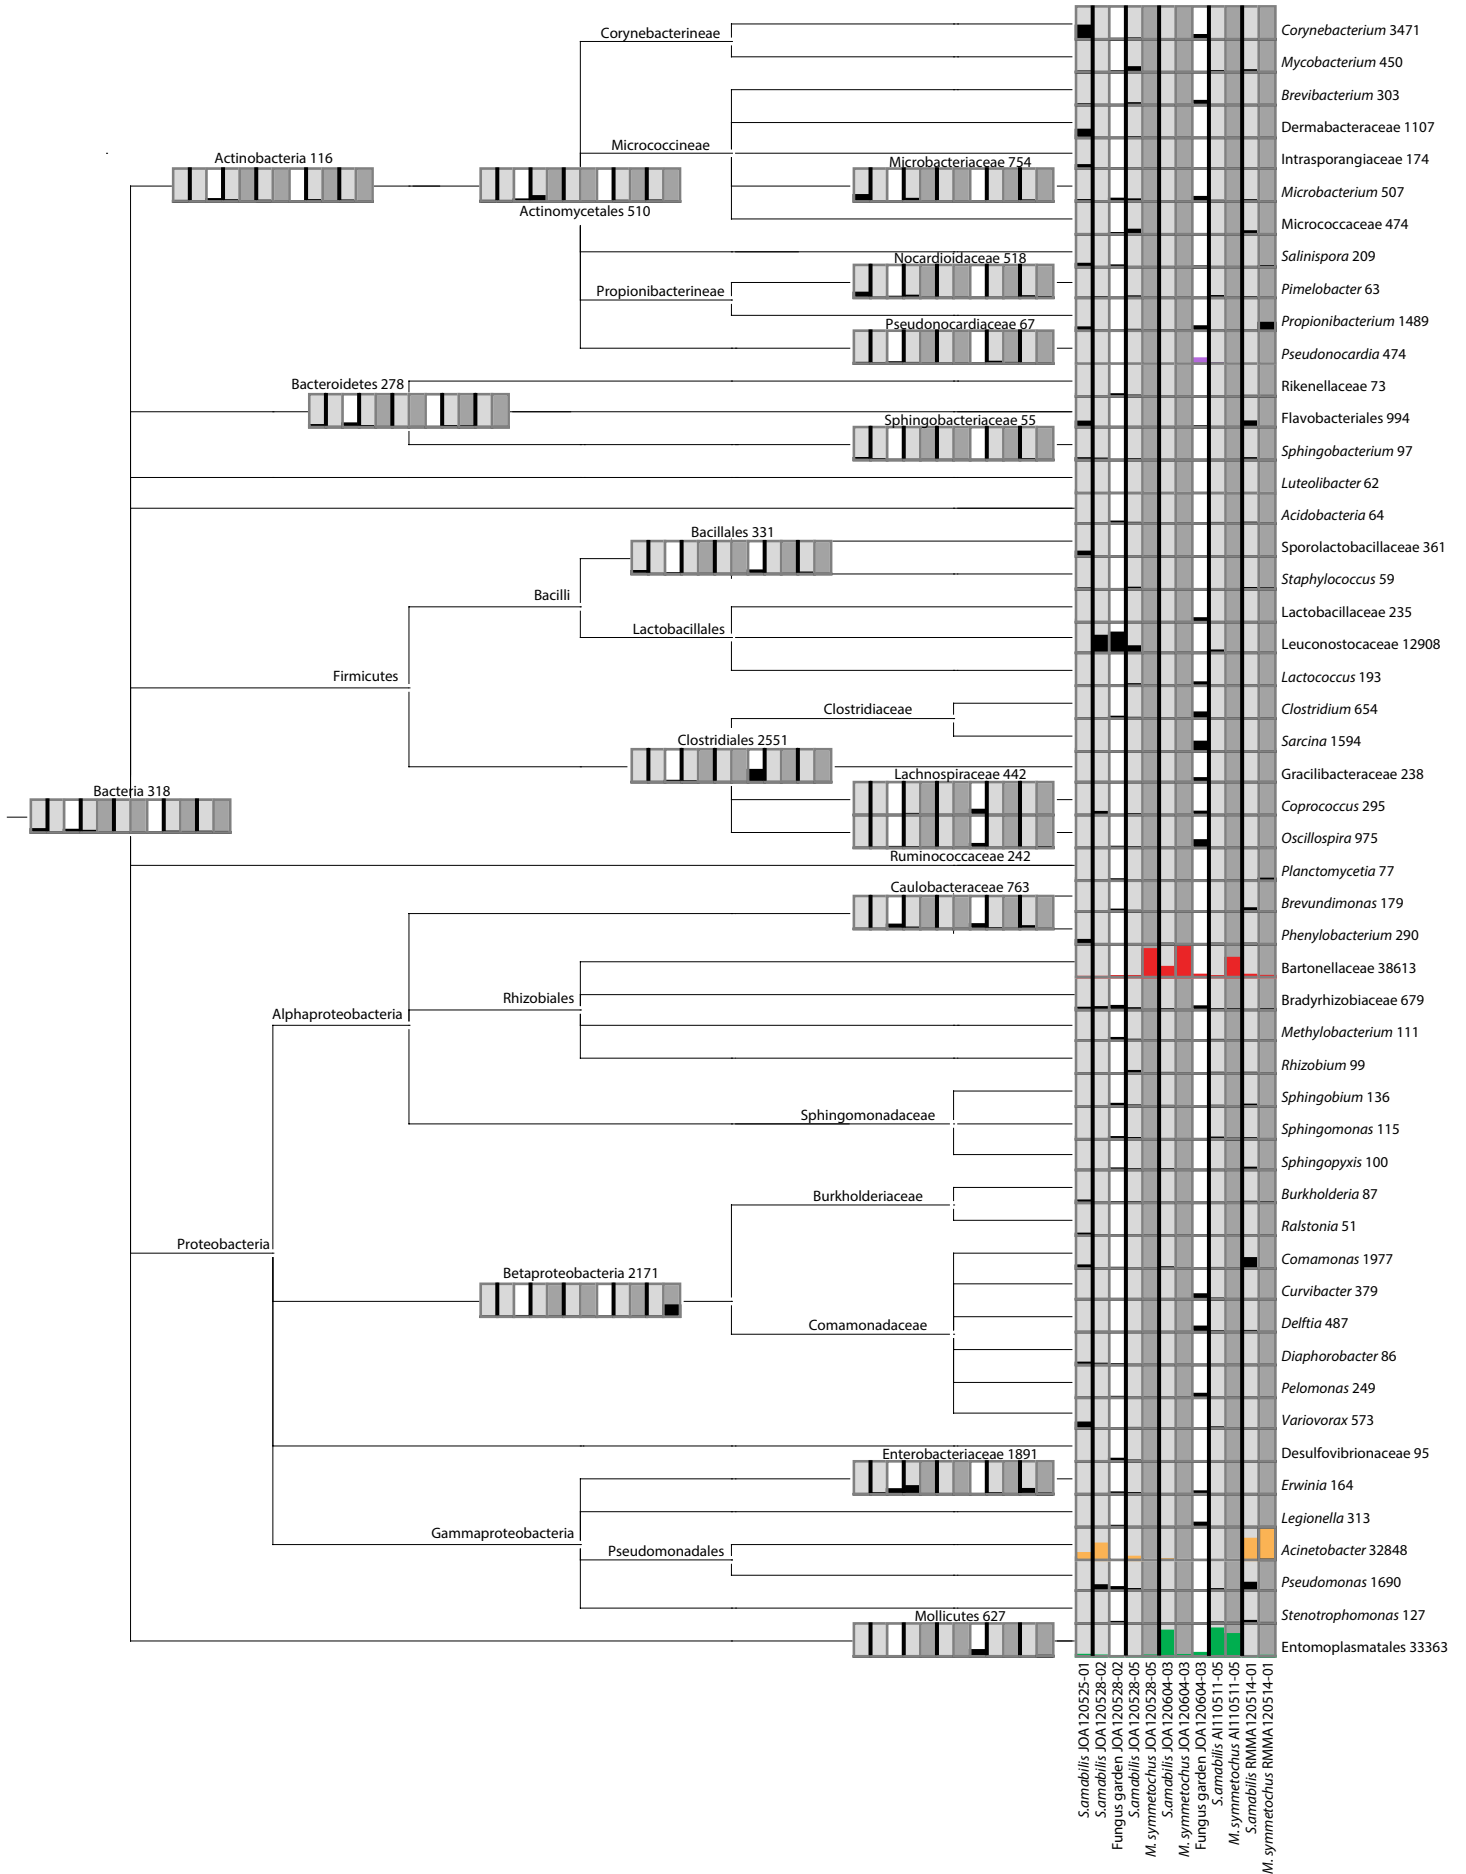

**Fig. S6** Taxonomic assignment of 454 16S rRNA gene amplicons of *Sericomyrmex amabilis* hosts, *Megalomyrmex symmetochus* guest ants, and their fungus gardens as produced by MEGAN4 (Huson *et al.* 2011). Light grey cells represent host samples, dark grey cells are guest ant samples, and white cells are fungus garden samples, and the degree to which individual cells are filled with black or color represents the square-root of the number of reads of each phylotype in each sample. Ant and garden samples are ordered by nest ID, first the two guest ant-free host colonies and then the four pairs of guest ant-infected host colonies with samples belonging to different nests separated by vertical lines. As in Fig. 3, the Entomoplasmatales are plotted in green, Bartonellaceae in red, *Acinetobacter* in orange and *Pseudonocardia* in purple, whereas all other bacterial lineages are plotted in black. The total number of assigned reads per phylotype across the twelve samples is given behind the taxonomic assignment. Only OTUs with  $\geq 50$  reads were used to generate this plot and were then lumped into phylotypes.

**Fig. S7**

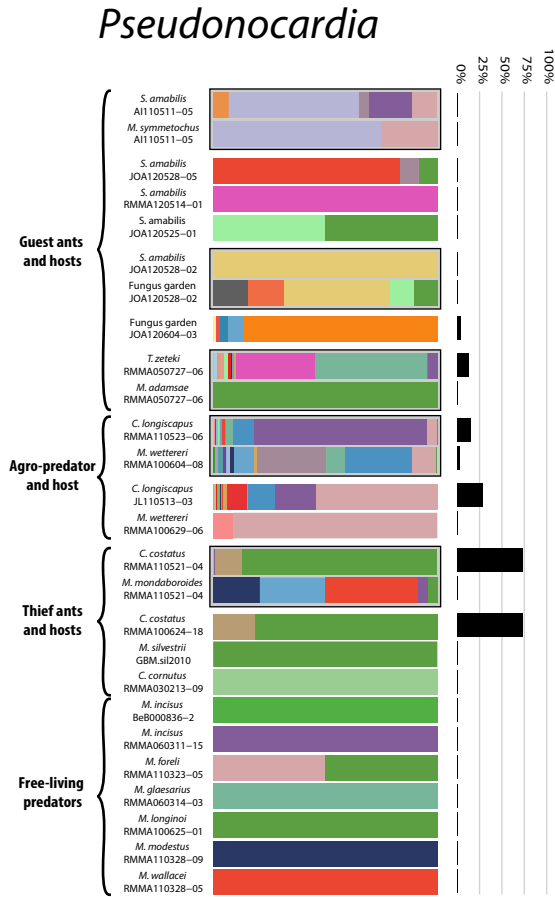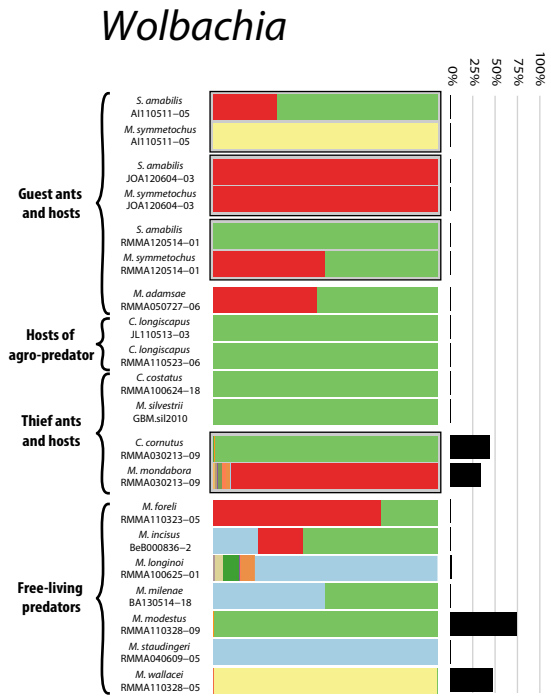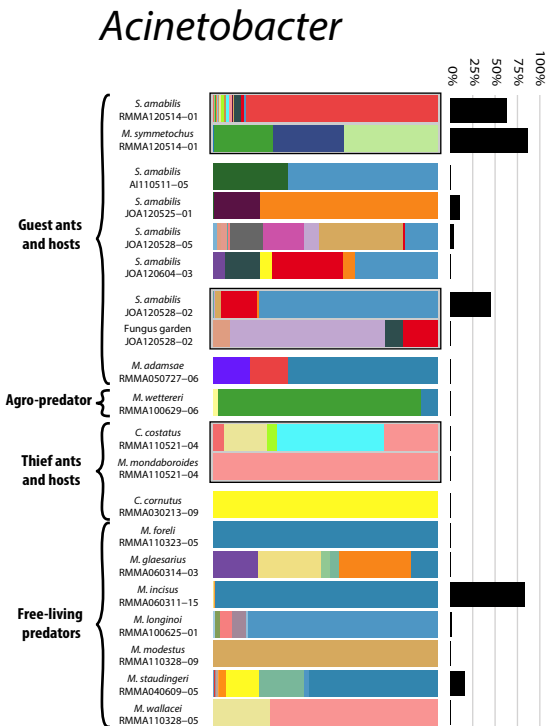

**Fig. S7** Distribution of 16S rRNA genotypes as identified by Oligotyping from the 454 16S rRNA pyrosequencing dataset based on all reads identified as *Pseudonocardia*, *Wolbachia* and *Acinetobacter*. As in Fig. 5, colors in the stacked bars represent the relative proportions of the different genotypes found in each sample, while black bar charts show the overall abundance of the specific bacterial lineages relative to the total microbiota in each sample, and boxes with black outlines highlight samples that were collected from the same nest. The number of reads per sample of all genotypes identified are given in Table S5, Supporting information.

Fig. S8

# Wolbachia wsp gene

Supergroups

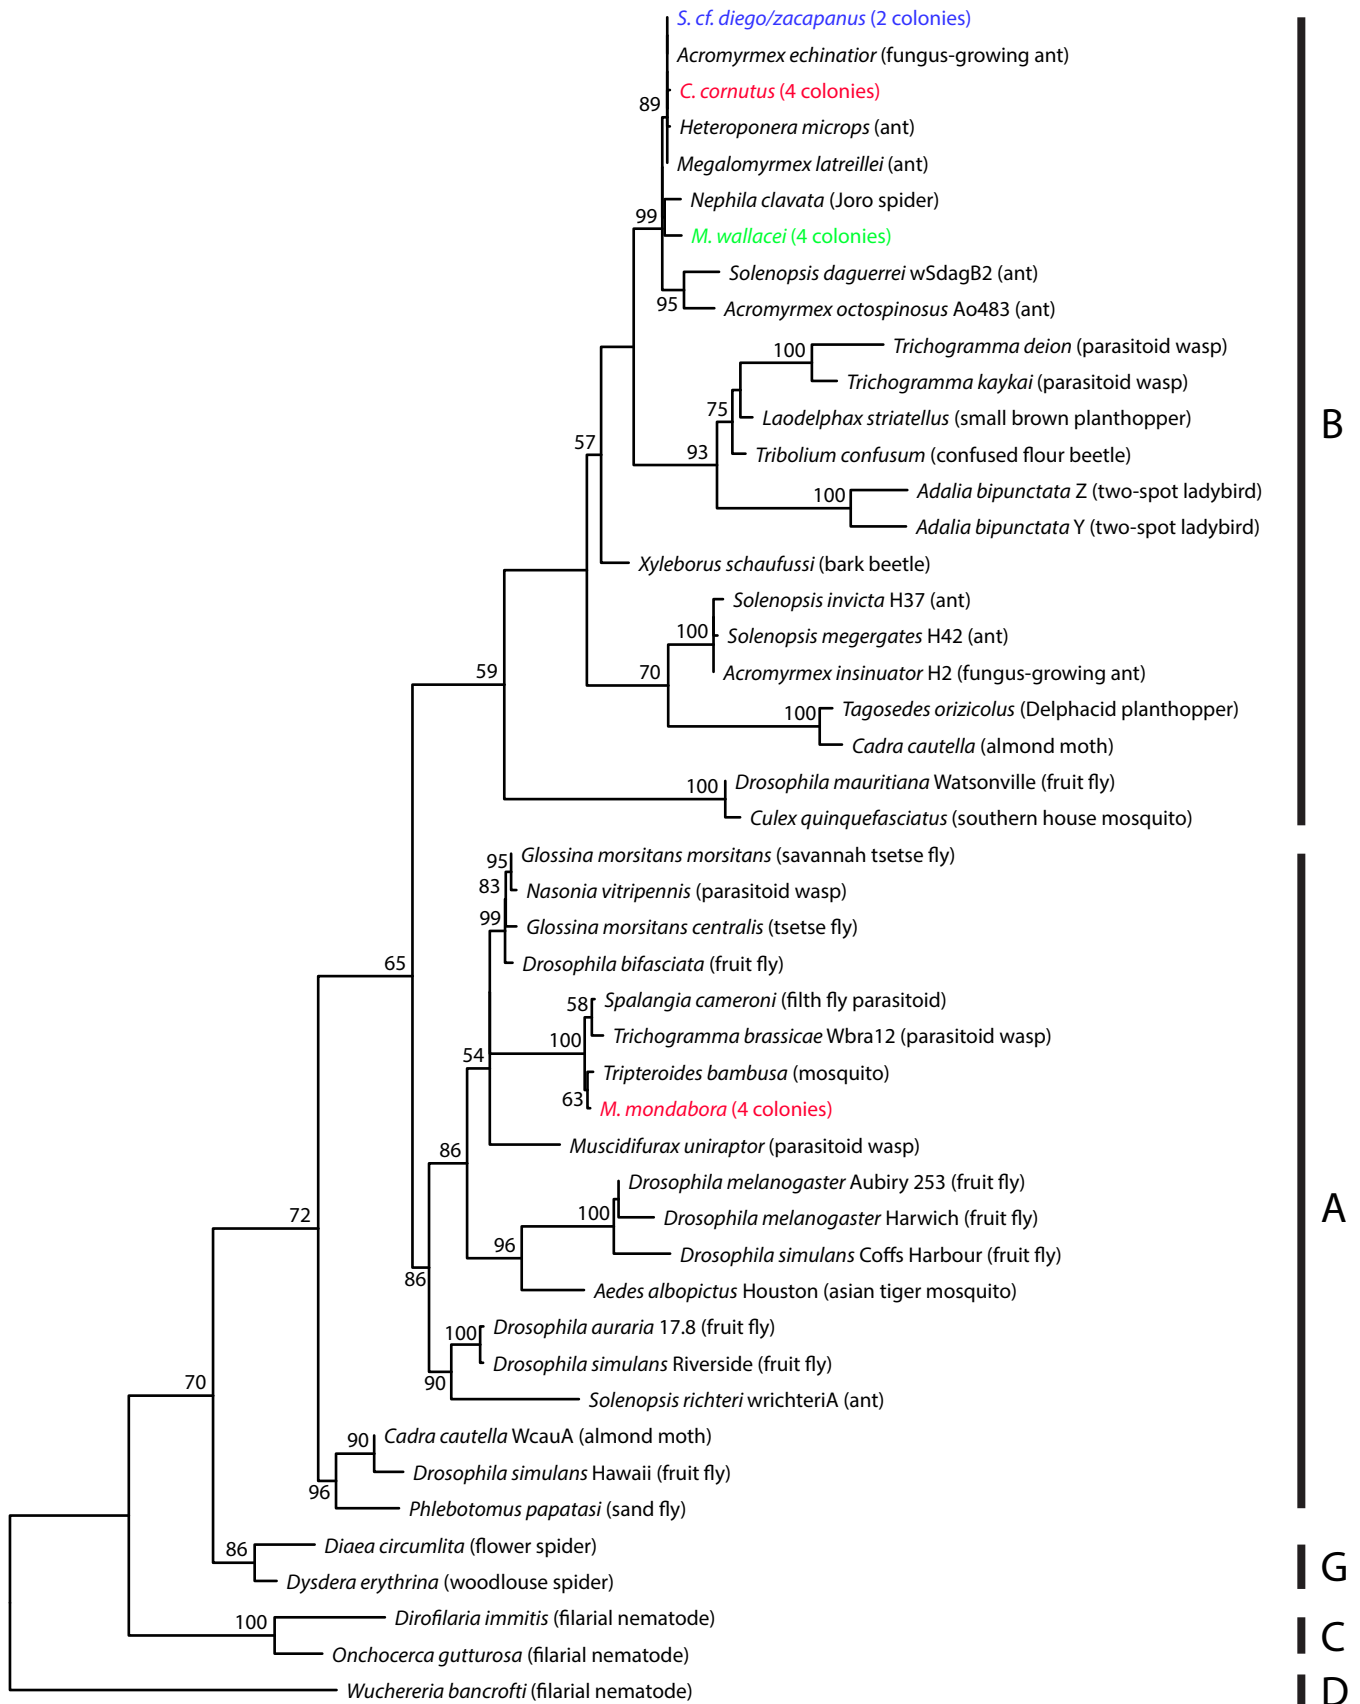

0.07

**Fig. S8** Maximum Likelihood phylogeny based on ca. 520 bp of the *Wolbachia wsp* gene from a subsample of positive PCRs in our diagnostic screening, aligned with closely related sequences obtained from GenBank. Sequences from this study are colored according to the specific host-parasite associations and free-living *Megalomyrmex* as in Fig. 1, while sequences obtained from GenBank are shown in black. Values above the nodes represent support  $\geq 50$  after 1,000 bootstrap replicates.



Fig. S9

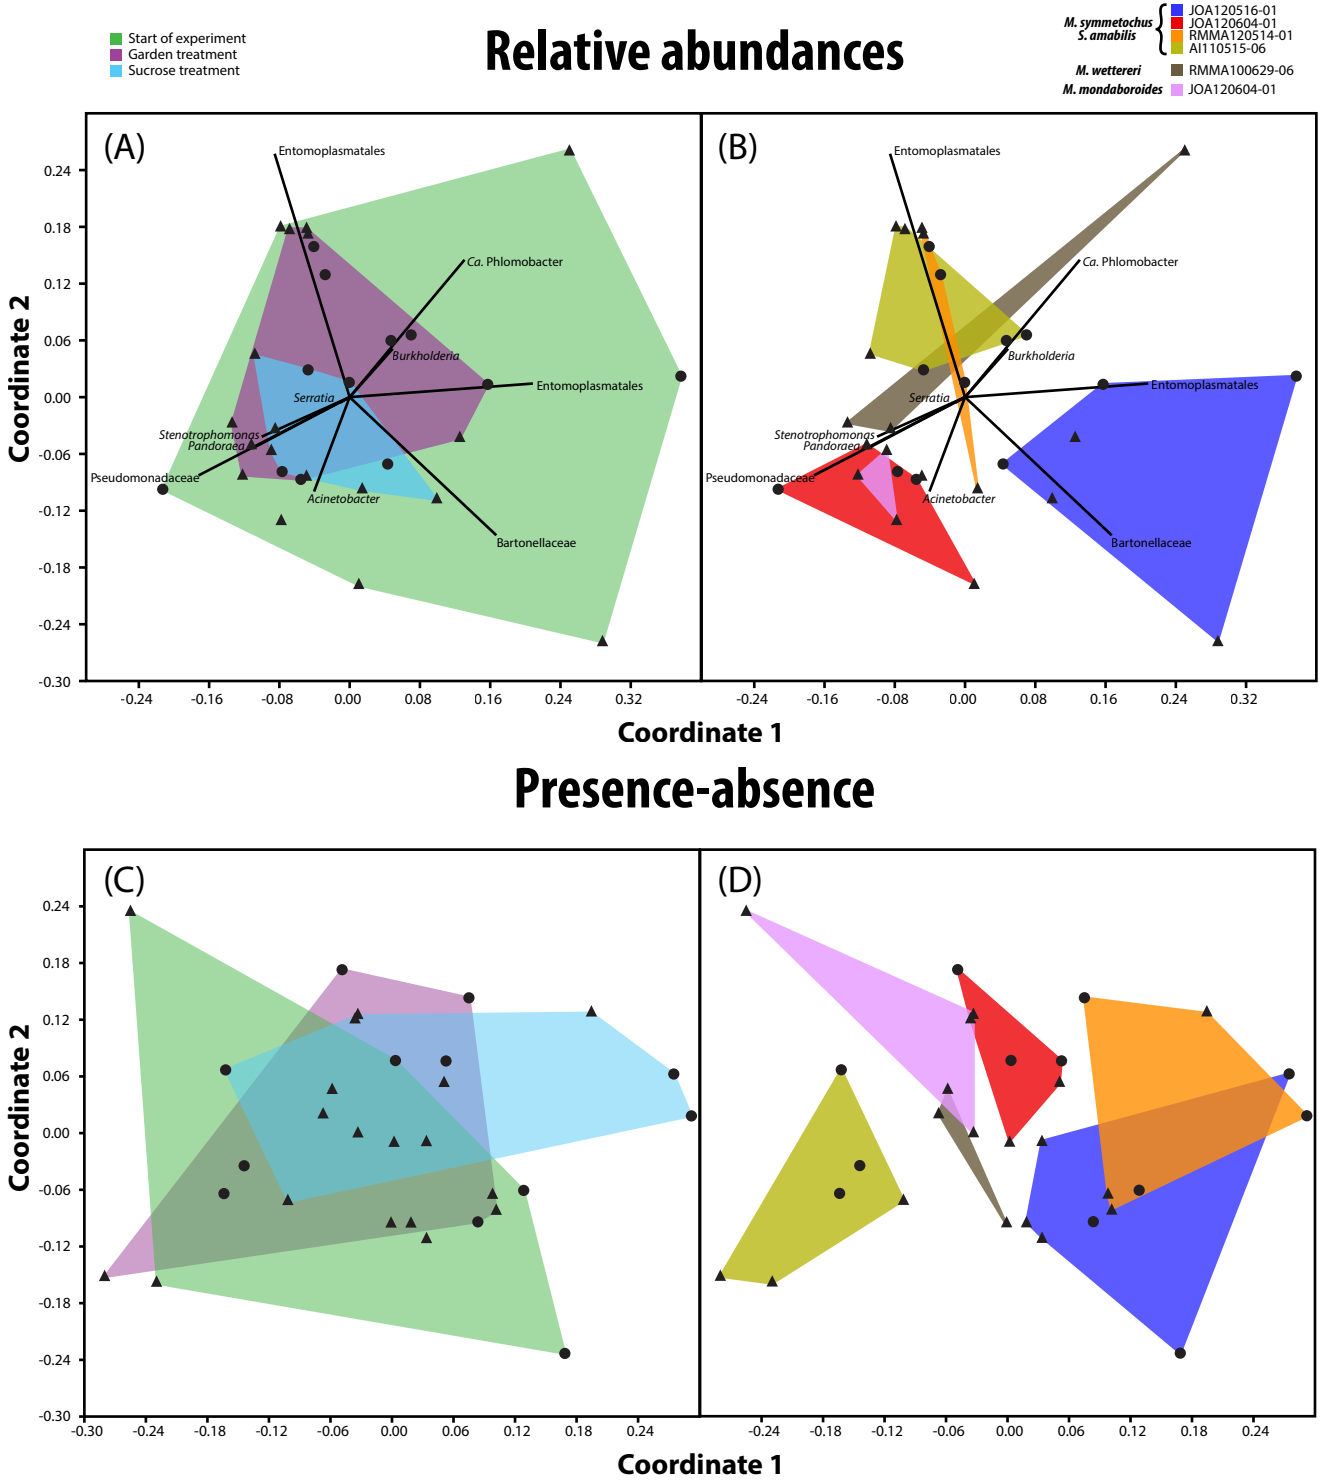

**Fig. S9** Non-metric multidimensional scaling of Bray-Curtis dissimilarities between the bacterial communities identified in the diet manipulation experiment samples, calculated in two separate analyses from a matrix of relative abundances (A and B) and from a presence-absence matrix (C and D). *Megalomyrmex* social parasites are shown as triangles and hosts as circles. Black lines show the ten OTUs that had the strongest associations with the ordination axes in the weighted analysis (A and B), with the lengths and angles of the lines representing correlations between these OTUs and the axes. The plots of the two analyses were each split in two to show either the areas of occupancy of samples belonging to the different treatment groups (A and C) or the areas occupied by samples belonging to the different nests (B and D). Color-legends are given towards the upper left (for panels A and C) and the upper right (for panels B and D).
